# Supplementary material for: Supporting Careers of Women in Clinical Immunology: From Conceptualization to Implementation
Source: Frontiers journal article supplement (doi:10.3389/fped.2022.864734), 2022-03-29
Supplement: Data_Sheet_1.pdf [file Data_Sheet_1.pdf]

Supplementary Material S1: WCIS survey questions

1. Please indicate your gender
  - a. Male
  - b. Female
  - c. Other (or Do not identify, Prefer not to say)
2. Which best represents your racial or ethnic heritage:
  - a. African American
  - b. East Asian
  - c. Caucasian
  - d. South Asian
  - e. Pacific Islander
  - f. Middle Eastern
  - g. Hispanic/Latino
  - h. Native American
  - i. Other
3. In what part of the world are you located?
  - a. North America
  - b. Central America
  - c. South America
  - d. Europe
  - e. Africa
  - f. Middle East
  - g. Asia
4. Please indicate the degree which you have or are working towards:
  - a. MS
  - b. MD
  - c. PhD
  - d. MD/PhD
  - e. RN
  - f. None
  - g. Other
5. In what capacity are you employed?
  - a. University
  - b. Government
  - c. Non-profit Research Center
  - d. Private practice
  - e. Laboratory
  - f. Industry
  - g. Other
6. If at University, please note your position
  - a. Instructor
  - b. Assistant Professor

- c. Associate Professor
  - d. Professor
  - e. Other
7. If in Private Practice, are you
- a. Junior partner
  - b. Senior partner
  - c. Employee of practice
  - d. Other
8. Do you work full time or part-time?
- a. Full time
  - b. Part time (at any percentage)
9. How much of your time is spent doing direct patient care?
- a. <25%
  - b. 25-50%
  - c. 50-75%
  - d. >75%
10. Are you married or in a long-term relationship?
- a. Yes
  - b. No
11. Which best describes your spouse's or partner's work?
- a. Works in the sciences
  - b. Works in a non-science field
  - c. Stay at home spouse/partner
  - d. Currently between jobs
  - e. Do not have spouse/partner
  - f. Other
12. Do you have children?
- a. No
  - b. Yes, under 18 years of age
  - c. Yes, older than 18 years of age
  - d. Yes, have children older and younger than 18 years of age
13. Did you take leave for the birth of your child(ren)? If so, how many weeks?
- a. Maternity
    - i. Child #1 \_\_\_\_\_
    - ii. Child #2 \_\_\_\_\_
    - iii. Child #3 \_\_\_\_\_
  - b. Paternity
    - i. Child #1 \_\_\_\_\_
    - ii. Child #2 \_\_\_\_\_
    - iii. Child #3 \_\_\_\_\_
14. Have you ever taken leave for elder care?
- a. Yes
  - b. No
15. How many years have you been in the field of immunology, since your training?

- a. <5 years
  - b. 5-10 years
  - c. 10-15 years
  - d. 15-20 years
  - e. >20 years
16. Do you currently serve on any boards or committees of local or national science committees?
- a. Yes
  - b. No
17. Which of the following issues do you feel are barriers currently facing women in the sciences?
- a. Grants/funding
  - b. Laboratory space
  - c. Child care support
  - d. Gender biases
  - e. Access to mentors
  - f. Lack of role models
  - g. Balancing Life goals
  - h. Having/raising children
  - i. Elder care
  - j. Low pay
  - k. Scarcity of Job openings
  - l. Other (specify)
18. Regarding the above barriers, which are the three most significant ones?
- a.
  - b.
  - c.
19. Does your workplace have a policy on career flexibility?
- a. Yes
  - b. No
  - c. Not sure
20. How well to you feel that you manage your career/work and home/family obligations?
- a. Great, I have harmony in all places
  - b. Pretty good, I am balanced in my goals and outcomes for several aspects of my life
  - c. Just OK, I always have loose ends which never get tied up
  - d. Awful, I have guilt for not being able to spend more time meeting all of my obligations
21. What percentage of your department or work/peer group are females?
- a. <10%
  - b. 10-25%
  - c. 25-50-%
  - d. 50-75%
  - e. >75%
22. Do you have female senior mentors or role models?
- a. No
  - b. Yes, less than 5 total
  - c. Yes, more than 5 total

23. Have you personally experienced gender bias at work, even if not blatantly?
- a. Yes
  - b. No
  - c. Not sure
24. Have you passed up or been excluded from a career opportunity or advancement due to any of the barriers mentioned in question #14?
- a. Yes
  - b. No
  - c. Not sure
25. Would you be interested in programming through the CIS regarding:
- a. Life Balance, Mindfulness and Resilience in the Sciences
    - i. Yes
    - ii. No
  - b. Pathways to Leadership
    - i. Yes
    - ii. No
  - c. Finding and building a good Mentor/Mentee relationship
    - i. Yes
    - ii. No
